# Supplementary material
Source: publisher site journal article supplement (https://www.dovepress.com/get_supplementary_file.php?f=253151.docx)

**Supplementary Figure 1. The effect of GW4869 on appearance of exosome and miR-638 expression.** (A and B) The appearance of exosome and miR-638 expression were detected after treatment of GW4869. **P*<0.05.


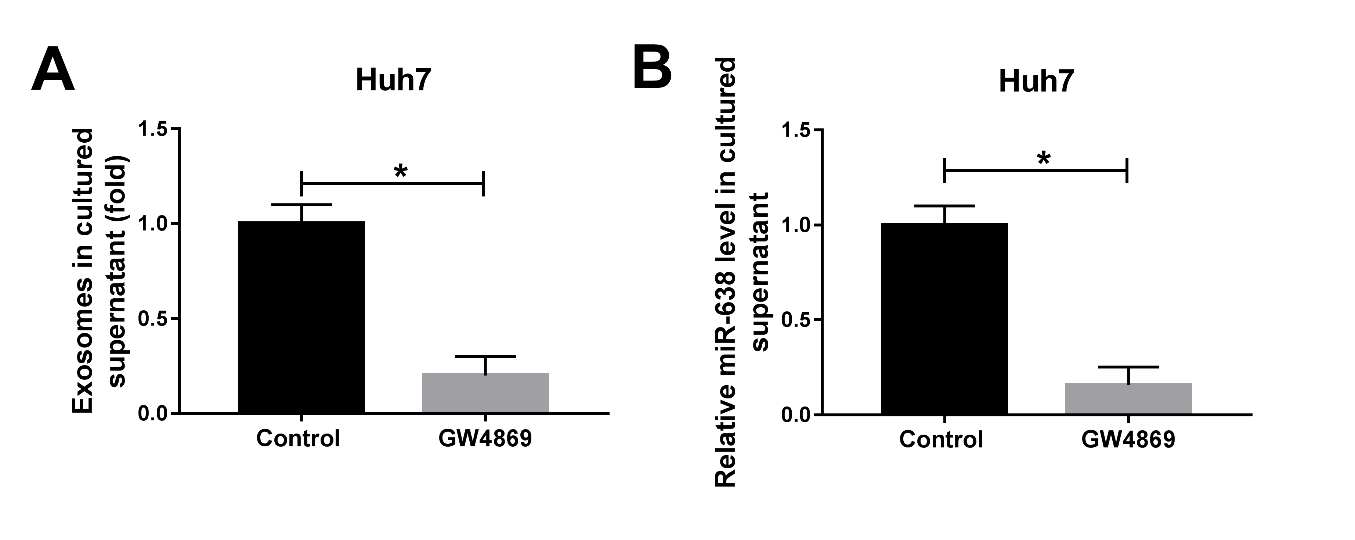


**Supplementary Figure 2. The expression of some miRNAs targeting SP1 in exosomes.** The levels of miR-31-5p, miR-138, miR-363-3p, miR-548b and miR-638 were detected in exosomes. **P*<0.05.


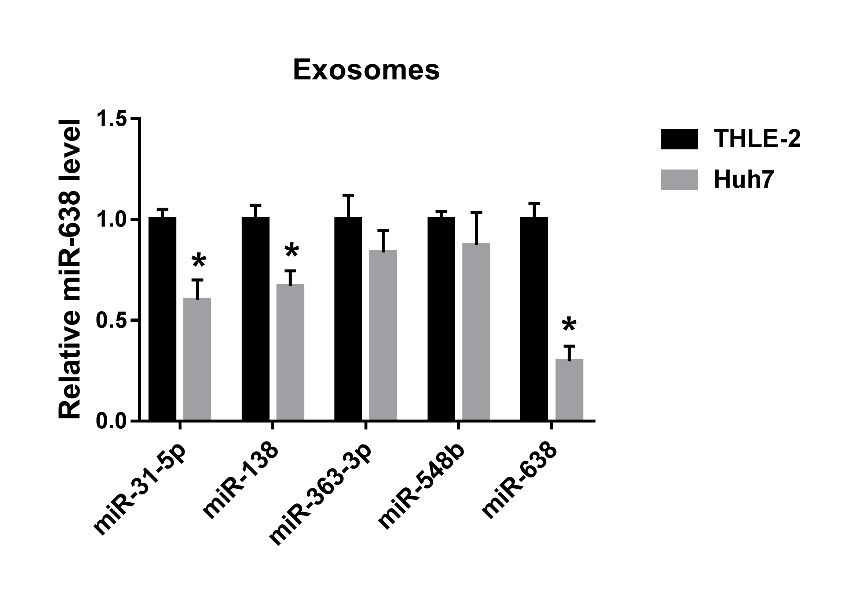

Supplement: Supplementary file 1 [file get_supplementary_file.php]
